# Supplementary material for: Sn-modified Zr-UiO-66 metal–organic frameworks for dihydroxyacetone conversion into lactic acid
Source: Royal Society of Chemistry journal article supplement (doi:10.1039/d4dt02975e), 2025-01-01
Supplement: d4dt02975e1.pdf [file d4dt02975e1.pdf]

## Supporting Information

### Sn-modified Zr-UiO-66 metal-organic frameworks for dihydroxyacetone conversion into lactic acid

Karina Kurmanbayeva,<sup>a</sup> Semyon Nikulaichev,<sup>a</sup> Nikolai A. Sokovikov<sup>b</sup>, Viktoriia V. Torbina,<sup>a</sup> and Olga V. Vodyankina<sup>\*a</sup>

<sup>a</sup> Tomsk State University; 36, Lenin Ave., 634050 Tomsk, Russia; leorina04@gmail.com (K.K.); lenenskiwedonot@mail.ru (S.N.), ms.itory@mail.ru (V.V.T.)

<sup>b</sup> Borekov Institute of Catalysis SB RAS, 5, Ak. Lavrentieva Ave., 630090 Novosibirsk, Russia (N.A.S.)

\*Correspondence: vodyankina\_o@mail.ru (O.V.V.)

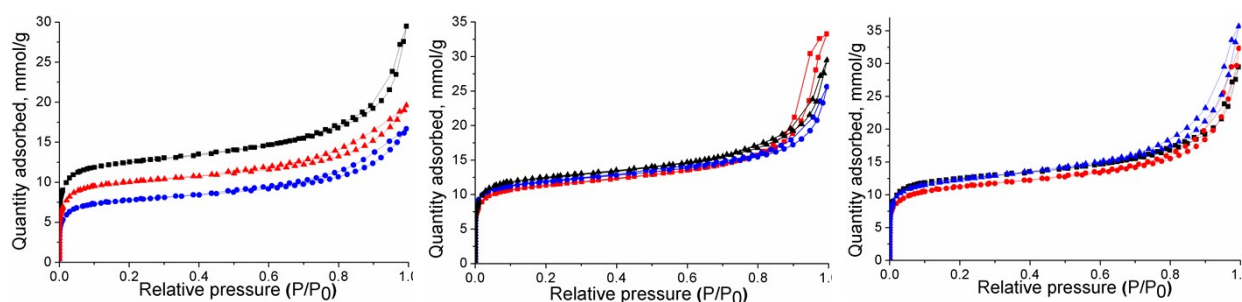

(a) Sn(II)-3.6-2/1 (red), Sn(II)-3.6-1/1 (blue), Zr-UiO-66 (black) (b) Sn(II)-1.0-2/1 (red), Sn(II)-1.0-1/1 (blue), Zr-UiO-66 (black) (c) Sn(IV)-1.0-2/1 (red), Sn(IV)-1.0-1/1 (blue), Zr-UiO-66 (black)

**Figure S1.** Low-temperature N<sub>2</sub> adsorption isotherms.

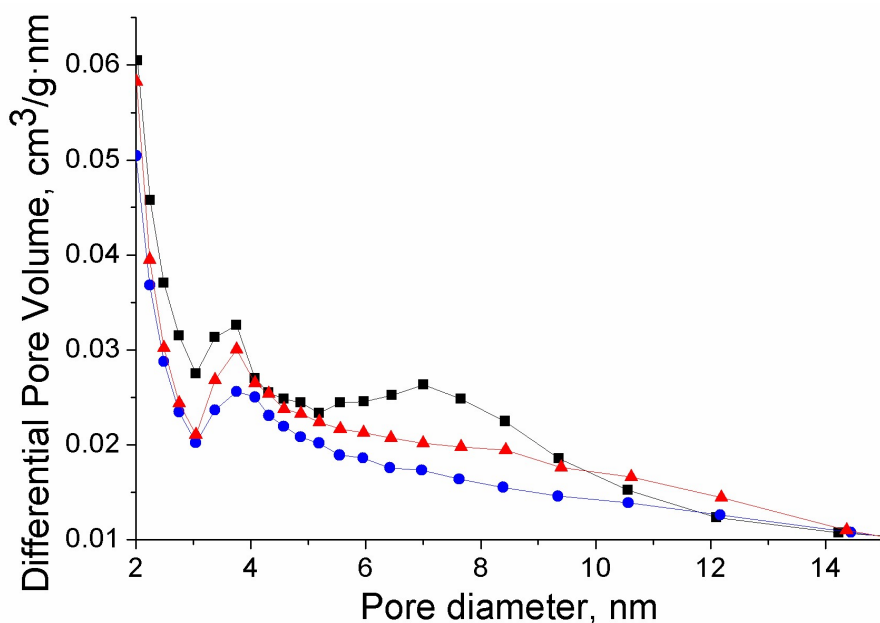

**Figure S2.** Pore size distribution curves calculated by BJH desorption method for Sn(II)-3.6-2/1 (red), Sn(II)-3.6-1/1 (blue), and Zr-UiO-66 (black).

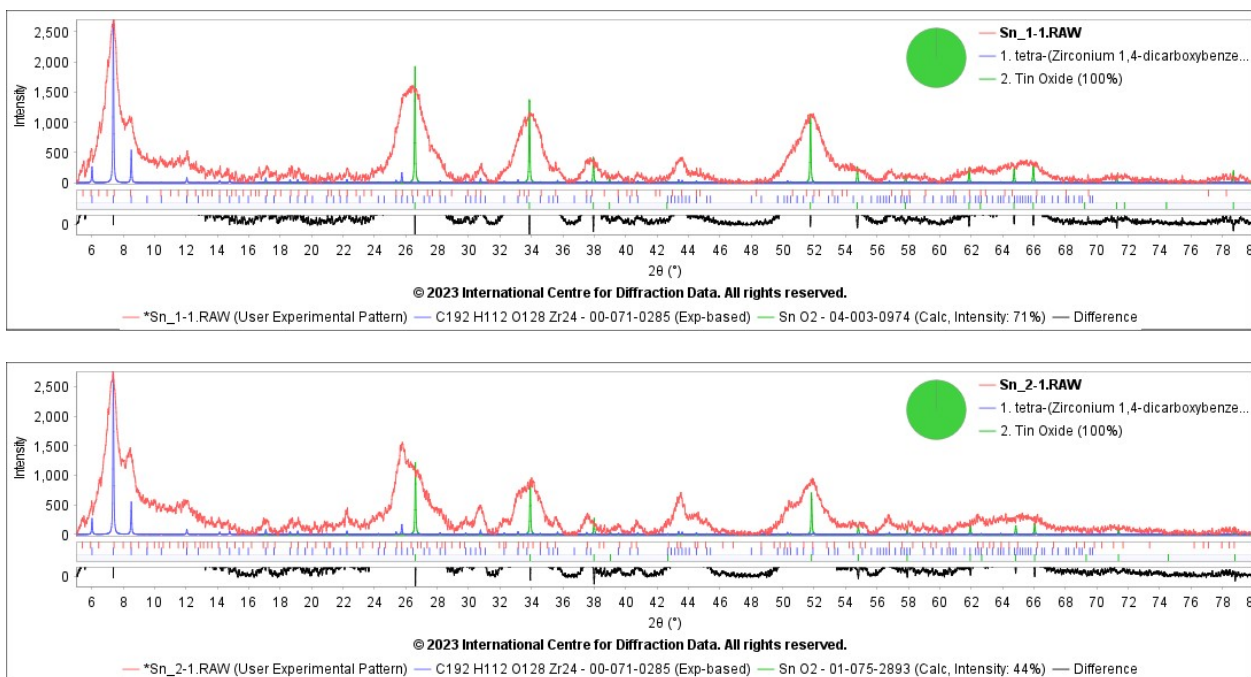

**Figure S3.** Modeling of phase composition for Sn(II)-3.6-1/1 (top) and Sn(II)-3.6-2/1 (bottom) in PDF4+ package.

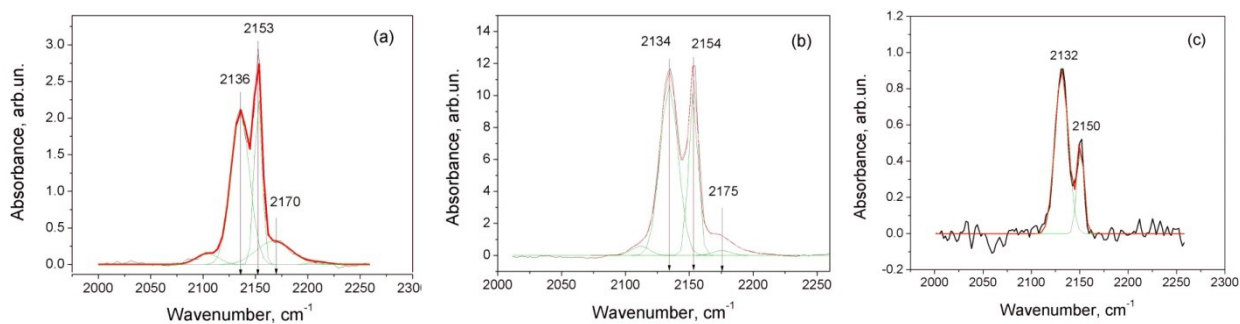

**Figure S4.** FTIR spectra of CO adsorbed at 77 K on Sn(II)-3.6-1/1 (a), Sn(II)-1.0-2/1 (b) and Sn(IV)-1.0-2/1 (c).

**Table S1.** Estimated formulas of MOFs of different series calculated from TGA and XRD data.

| Sample         | Formula                                                                                                                     |
|----------------|-----------------------------------------------------------------------------------------------------------------------------|
| Sn(II)-3.6-1/1 | $[\text{Zr}_3\text{Sn}_3\text{O}_4(\text{OH})_4](\text{C}_6\text{H}_4(\text{COO})_2)_{3.3}\text{Cl}_{0.6}(\text{OH})_{2.1}$ |
| Sn(II)-1.0-2/1 | $[\text{Zr}_{5.8}\text{Sn}_{0.2}\text{O}_4(\text{OH})_4](\text{C}_6\text{H}_4(\text{COO})_2)_{7.3}\text{Cl}_{0.2}$          |
| Sn(IV)-1.0-2/1 | $[\text{Zr}_{5.7}\text{Sn}_{0.3}\text{O}_4(\text{OH})_4](\text{C}_6\text{H}_4(\text{COO})_2)_{7.9}\text{Cl}_{0.4}$          |
